# Supplementary material
Source: PubMed Central journal article supplement (PMC2276438)
Supplement: plntcell_tpc.107.057281_1.pdf [file plntcell_tpc.107.057281_1.pdf]

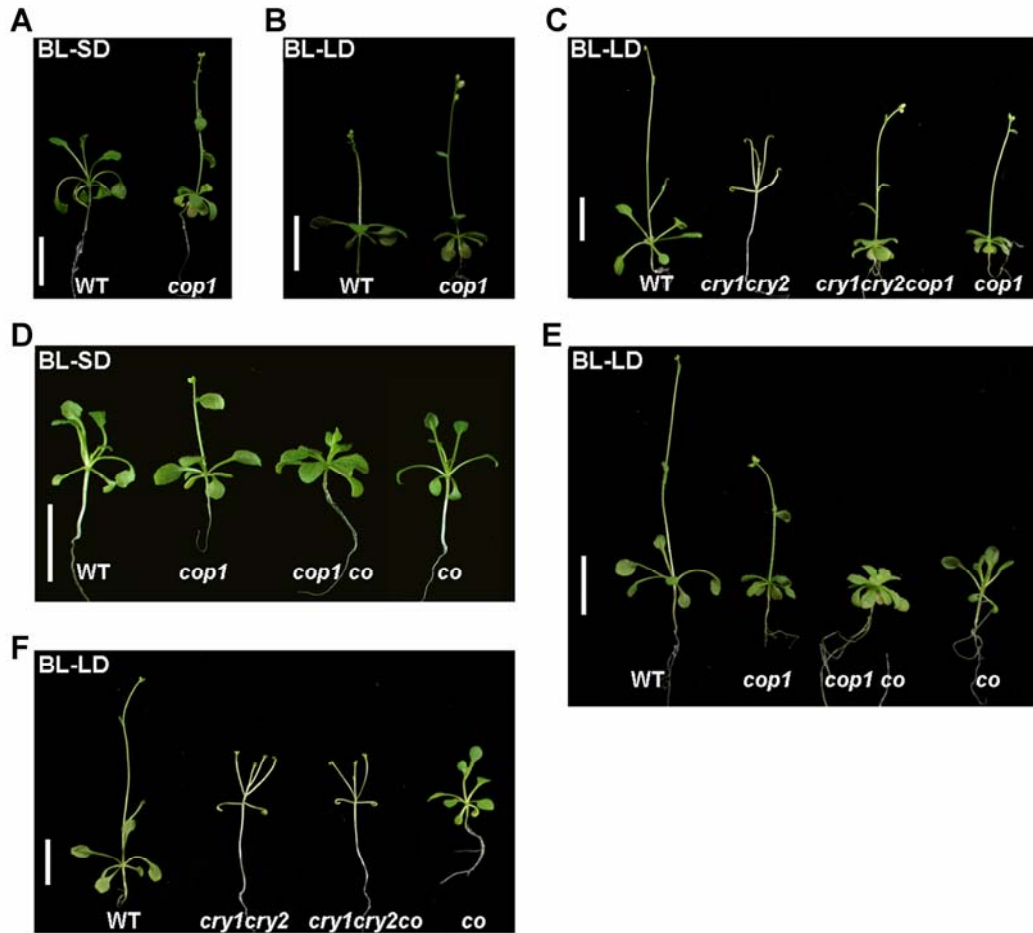

**Supplemental Figure 1. Phenotypes of Plants Grown in LD or SD Illuminated by Blue Light (BL-LD or BL-SD).**

(A) and (B) The *cop1* mutant flowers significantly and slightly earlier than wild type in BL-SD and BL-LD, respectively. (C) The *cry1 cry2 cop1* triple mutant flowers as early as *cop1* single mutant in BL-LD. (D) and (E) The *cop1 co* double mutant flowers as late as the *co* single mutant in both BL-SD and BL-LD. (F) The *cry1 cry2 co* triple mutant flowers as late as the *cry1 cry2* double mutant in BL-LD. Scale bar, 1 cm.

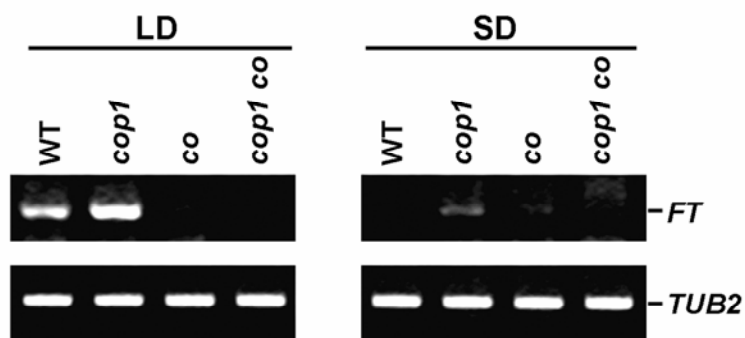

**Supplemental Figure 2. RT-PCR Analysis of *FT* Expression.**

*FT* expression is up-regulated in *cop1* mutant in both LD and SD, but dramatically down-regulated in *co* and *cop1 co* mutants. Seedlings were grown in LD or SD for 8 days, and then collected for RNA extraction before it was getting dark at day 9. *TUB2* was amplified as an internal loading control.

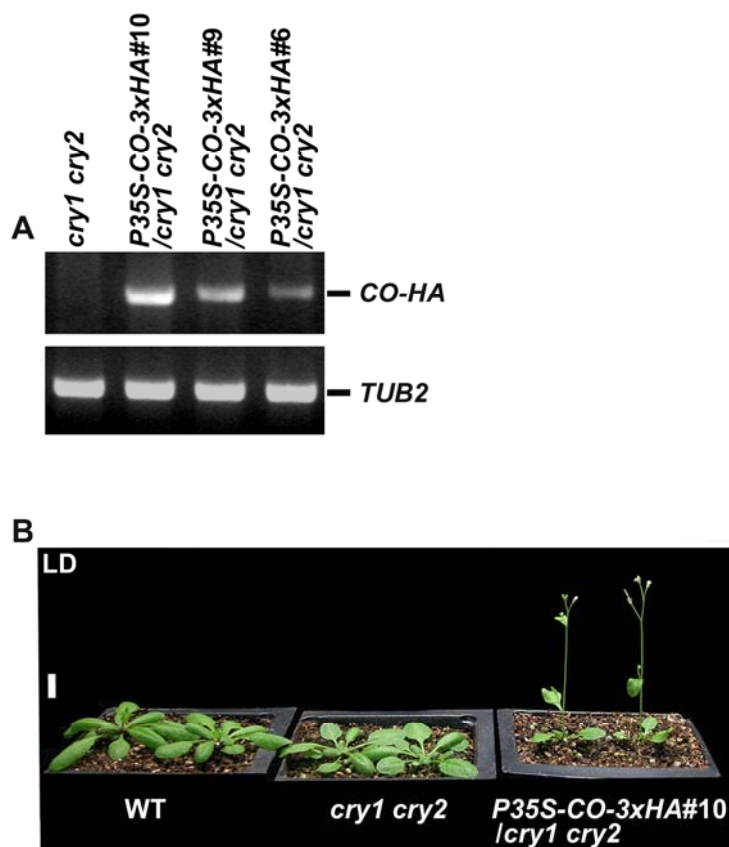

**Supplemental Figure 3. Phenotype of *P35S-CO-3xHA/cry1 cry2* Plants in LD.**

(A) RT-PCR analysis showing expression of *CO-HA* in transgenic *P35S-CO-3xHA/cry1 cry2* plants. Seedlings were grown for 8 days in LD, and then

collected for RNA extraction 4h after light was on. *TUB2* was amplified as an internal loading control.

(B) *P35S-CO-3xHA#10 /cry1cry2* plants flower earlier than *cry1cry2* mutant in LD. Scale bar, 1cm.

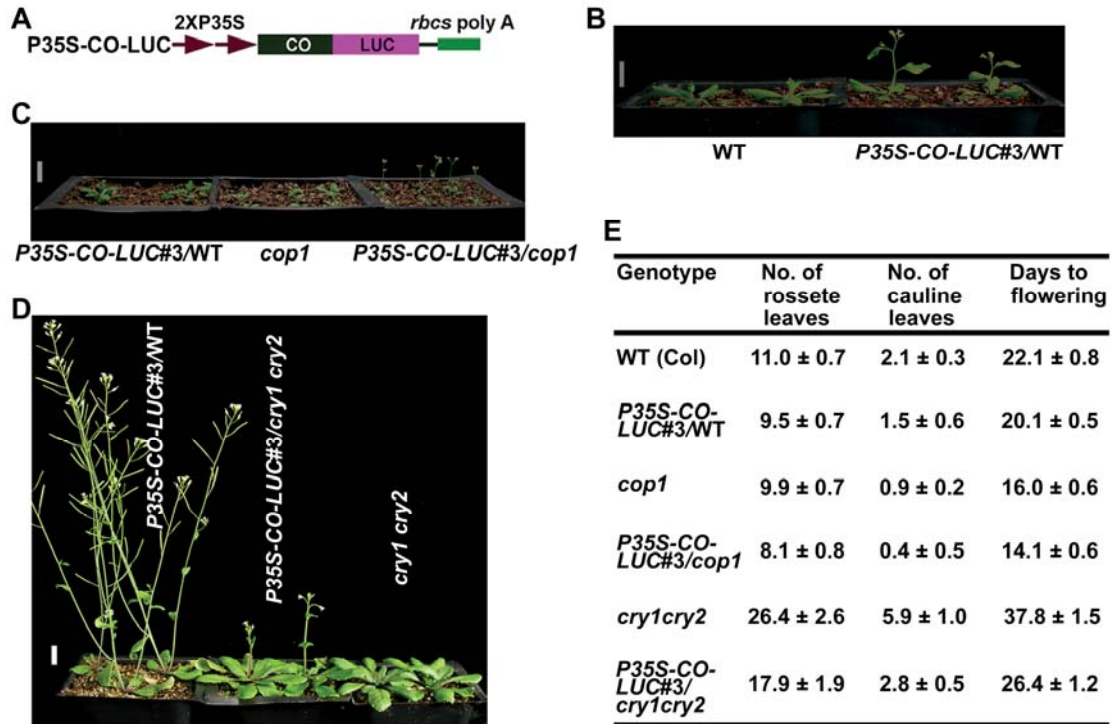

**Supplemental Figure 4. Phenotypes of *cop1* and *cry1 cry2* Mutant Plants Expressing *CO-LUC* in LD.**

(A) A construct constitutively expressing *CO-LUC*.

(B) *P35S-CO-LUC#3 /WT* plants flower earlier than WT.

(C) *P35S-CO-LUC#3/cop1* plants flower earlier than both *P35S-CO-LUC#3 /WT* and *cop1* mutant plants.

(D) *P35S-CO-LUC#3/WT* plants flower earlier than *P35S-CO-LUC#3/cry1 cry2* plants, and *P35S-CO-LUC#3/cry1 cry2* plants flower earlier than *cry1 cry2* mutant plants. The representative plants shown in (B-D) were photographed 20, 24, and 33 days post germination in LD, respectively. Scale bar, 1cm.

(E) Flowering time of transgenic plants expressing *CO-LUC* in LDs. Flowering time was measured as the total number of leaves produced or days to bolting. Data from 20 individuals for each genotype ± S.D.

**Supplemental Table 1. Flowering Time of Mutant Plants Grown in LD or SD Illuminated by Blue Light (BL-LD or BL-SD).**

Plants in each experiment were grown under BL-LD or BL-SD as indicated. Flowering time was measured as the total number of leaves produced or days to flowering. When the days to flowering is used as the measure of flowering time, the *cry1 cry2* and the *co* mutants flower late in BL-LD, the *cop1* mutant flowers early in BL-LD and BL-SD, the *cry1 cry2 cop1* triple mutant flowers as early as the *cop1* single mutant in BL-LD, the *cry1 cry2 co* triple mutant flowers as late as the *cry1 cry2* double mutant in BL-LD, and the *cop1 co* double mutant flowers as late as the *co* single mutant in BL-LD. Data from at least 20 individuals for each genotype  $\pm$  S.D.

| Genotype                          | BL-LD                 |                       |                   | BL-SD                 |                       |                   |
|-----------------------------------|-----------------------|-----------------------|-------------------|-----------------------|-----------------------|-------------------|
|                                   | No. of rosette leaves | No. of cauline leaves | Days to flowering | No. of rosette leaves | No. of cauline leaves | Days to flowering |
| WT (Col)                          | 5.9 $\pm$ 0.8         | 2.0 $\pm$ 0.4         | 17.1 $\pm$ 0.6    | 6.5 $\pm$ 0.5         | 3.4 $\pm$ 0.5         | 31.9 $\pm$ 0.8    |
| WT (Ler)                          | 5.7 $\pm$ 0.5         | 2.2 $\pm$ 0.6         | 16.7 $\pm$ 0.4    | 6.1 $\pm$ 0.3         | 3.4 $\pm$ 0.6         | 30.9 $\pm$ 0.8    |
| <i>cry1 cry2</i>                  | 4.2 $\pm$ 0.4         | 2.7 $\pm$ 0.4         | 24.0 $\pm$ 0.6    | 5.6 $\pm$ 0.5         | 2.4 $\pm$ 0.5         | 36.1 $\pm$ 0.7    |
| <i>cop1</i>                       | 7.4 $\pm$ 0.5         | 1.7 $\pm$ 0.7         | 16.3 $\pm$ 0.5    | 8.3 $\pm$ 0.6         | 1.8 $\pm$ 0.4         | 21.1 $\pm$ 0.7    |
| <i>co</i> (Col)                   | 6.0 $\pm$ 0.4         | 2.6 $\pm$ 0.5         | 21.1 $\pm$ 0.6    | 6.1 $\pm$ 0.2         | 4.1 $\pm$ 0.4         | 32.8 $\pm$ 0.7    |
| <i>co</i> (Ler)                   | 6.1 $\pm$ 0.7         | 2.6 $\pm$ 0.5         | 21.7 $\pm$ 0.6    | 5.6 $\pm$ 0.5         | 2.7 $\pm$ 0.5         | 31.2 $\pm$ 0.7    |
| <i>cry1 cry2 cop1</i>             | 8.7 $\pm$ 0.5         | 1.9 $\pm$ 0.4         | 16.7 $\pm$ 0.5    | 8.4 $\pm$ 0.5         | 1.9 $\pm$ 0.3         | 21.8 $\pm$ 0.8    |
| <i>cry1 cry2 co</i>               | 4.2 $\pm$ 0.4         | 2.4 $\pm$ 0.6         | 25.2 $\pm$ 0.6    | 5.3 $\pm$ 0.7         | 2.6 $\pm$ 0.5         | 38.5 $\pm$ 0.7    |
| <i>cop1 co</i>                    | 10.1 $\pm$ 0.6        | 1.2 $\pm$ 0.4         | 22.0 $\pm$ 0.8    | 11.2 $\pm$ 0.8        | 1.9 $\pm$ 0.3         | 32.3 $\pm$ 1.2    |
| <i>P35S-CO-3xHA#10/ cry1 cry2</i> | 5.6 $\pm$ 0.5         | 2.2 $\pm$ 0.4         | 15.3 $\pm$ 0.7    | 5.7 $\pm$ 0.5         | 2.2 $\pm$ 0.5         | 21.3 $\pm$ 0.4    |
